# Supplementary material
Source: PubMed Central journal article supplement (PMC6517991)

# **Reactive oxygen species are essential for autophagy and specifically regulate the activity of Atg4**

Ruth Scherz-Shouval, Elena Shvets, Ephraim Fass, Hagai Shorer, Lidor Gil and Zvulun Elazar

## **Appendix**

Appendix Figure S1

### Appendix Figure S1

Three repeats of the experiment shown in Figure 7A for WT and C81S

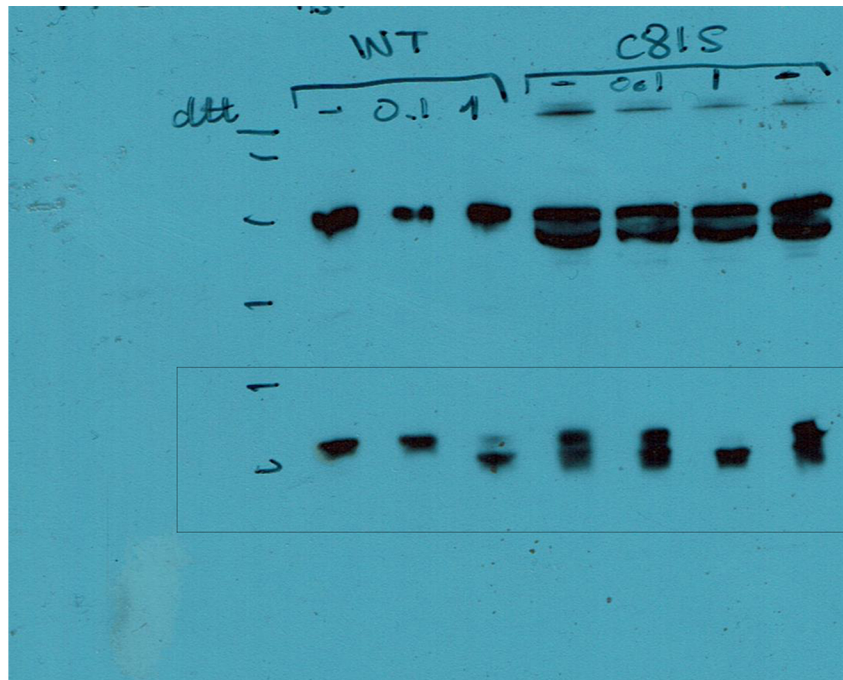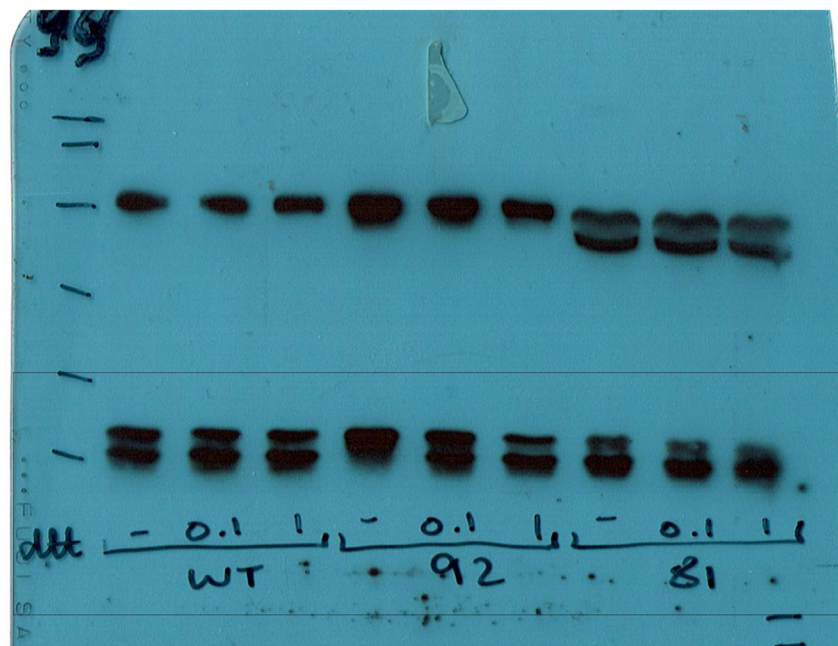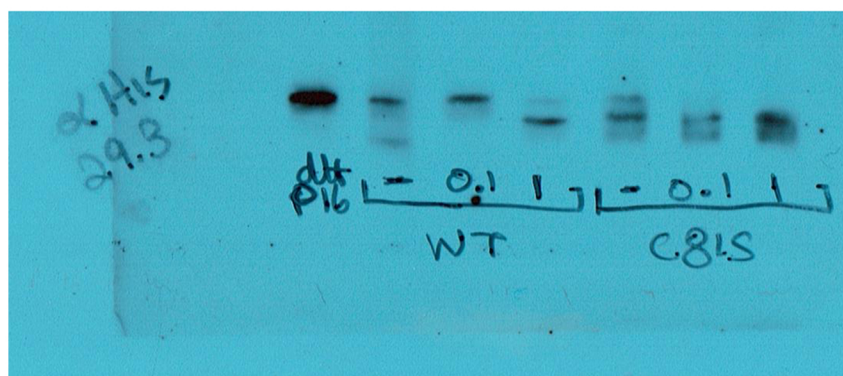

Supplement: EMBJ-38-e101812-s001.pdf [file EMBJ-38-e101812-s001.pdf]
